# Supplementary material for: Metabolomics-driven quantitative analysis of ammonia assimilation in E. coli
Source: PubMed Central journal article supplement — Mol Syst Biol. 2009 Aug 18;5:302. doi: 10.1038/msb.2009.60 (PMC2736657; doi:10.1038/msb.2009.60), 2009-08-18
Supplement: msb200960-s1.pdf [file msb200960-s1.pdf]

# Metabolomics-driven quantitative analysis of ammonia assimilation in *E. coli*

Jie Yuan<sup>1,2</sup>, Christopher D. Doucette<sup>1,3</sup>, William U. Fowler<sup>1,2</sup>, Xiao-Jiang Feng<sup>2</sup>, Matthew Piazza<sup>1,2</sup>, Herschel A. Rabitz<sup>2</sup>, Ned S. Wingreen<sup>1,3</sup>, Joshua D. Rabinowitz<sup>1,2</sup>

## Supplemental material

### Table of contents

|              |                                                                                                                                                     |    |
|--------------|-----------------------------------------------------------------------------------------------------------------------------------------------------|----|
| Supp. Fig. 1 | Metabolite concentrations and fluxes in $\Delta$ GDH and $\Delta$ GOGAT <i>E. coli</i> grown with ample glucose and ammonium.                       | 1  |
| Supp. Fig. 2 | Growth of $\Delta$ GDH and $\Delta$ GOGAT on plates with 10 mM ammonia, 2mM ammonia, and after N-upshift.                                           | 2  |
| Supp. Fig. 3 | Percentage of information in metabolome response matrix (Fig. 3) that is captured by characteristic metabolite response patterns identified by SVD. | 3  |
| Supp. Fig. 4 | Response of glycolytic intermediates, TCA cycle intermediates and key cofactors to N-upshift.                                                       | 4  |
| Supp. Fig. 5 | $\Delta$ AmtB displays similar responses to N-upshift as WT.                                                                                        | 5  |
| Supp. Fig. 6 | Consumption of the trace residual ammonium on the filters when N-limited <i>E. coli</i> were shifted to plates with zero ammonium.                  | 6  |
| Supp. Fig. 7 | Amino acids leaked by $\Delta$ AT/AR strain upon N-upshift.                                                                                         | 7  |
| Supp. Fig. 8 | Model simulation of flux dynamics in wild-type during 13-fold N-upshift.                                                                            | 8  |
| Supp. Tab. 1 | Measured fluxes of glutamate and glutamine in wild-type, $\Delta$ GDH and $\Delta$ GOGAT.                                                           | 9  |
| Supp. Tab. 2 | Metabolite projections onto the top two characteristic response patterns identified by SVD.                                                         | 10 |
| Supp. Tab. 3 | Parameter values for the kinetic model.                                                                                                             | 12 |
| Supp. Tab. 4 | Analysis of GOGAT reaction.                                                                                                                         | 13 |
| Supp. Tab. 5 | Formulation and equations employed in the model.                                                                                                    | 14 |
| Supp. Tab. 6 | Analysis of Aspartate transaminase reaction.                                                                                                        | 16 |
| Supp. Tab. 7 | Response coefficient of metabolite pools and fluxes to model parameters.                                                                            | 17 |

Supplementary Figure 1. Metabolite concentrations and fluxes in  $\Delta$ GDH and  $\Delta$ GOGAT *E. coli* grown with ample glucose and ammonium. (A) Growth curves of wild-type (■),  $\Delta$ GDH (●), and  $\Delta$ GOGAT (▲) *E. coli* on membrane filters sitting atop agarose plates loaded with minimal media with 10 mM ammonium. Data are mean  $\pm$  SEM (N = 3 independent experiments) and dashed lines show fits to an exponential growth function. (B) Correlation of metabolite levels in  $\Delta$ GDH (●) and  $\Delta$ GOGAT (▲) to those in wild-type;  $R^2=0.92$  for both strains. Boxes show the central nitrogen assimilation compounds  $\alpha$ -ketoglutarate ( $\alpha$ ), glutamate (E), glutamine (Q). Data are means ( $n \geq 3$  independent cultures). Metabolites were measured with LC-MS using  $^{13}\text{C}$  cell extract as internal standard. Plotted were  $^{12}\text{C}$  signal/ $^{13}\text{C}$  signal. (C) Kinetic flux profiling results for glutamine. The Y-axis indicates the fraction of unlabeled glutamine as a function of time after switching the cells to  $^{15}\text{N}$ -ammonium (X-axis). The rate of decay is proportional to the glutamine flux. (D) Analogous kinetic flux profiling results for glutamate. In C and D, data are mean  $\pm$  SEM ( $n \geq 3$  for each strain), and curves represent fits generated by Origin (version 6.0, OriginLab Corporation, Northampton, MA) to the following exponential equation  $X = (1 - \alpha) \exp(-k \cdot t) + \alpha$ , where X represent the fraction of unlabeled metabolite (See Yuan *et al* 2008 for derivation and further details). The color key is the same as in panel A.

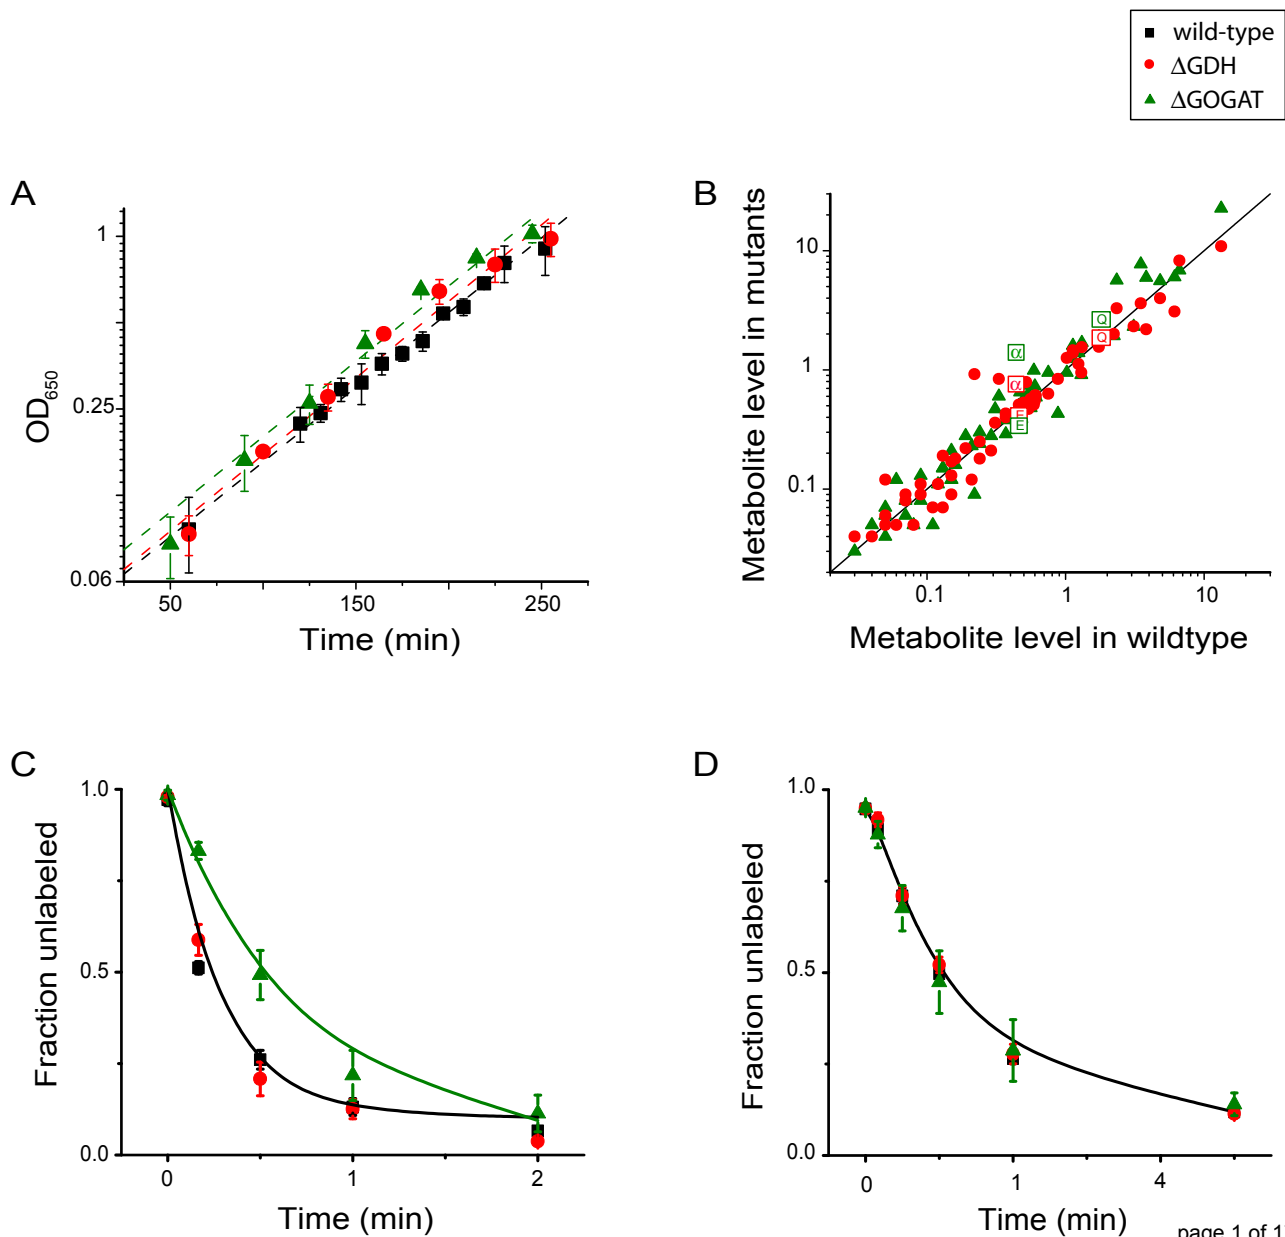

Supplementary Figure 2. Growth of  $\Delta$ GDH (left) and  $\Delta$ GOGAT (right) on plates with 10 mM ammonia (gray), 2mM ammonia (cyan), and after N-upshift (blue). Data are represented as mean  $\pm$  SEM ( $n \geq 2$  independent experiments) The gray lines are fits to wildtype growth curves as shown in Fig. 2.

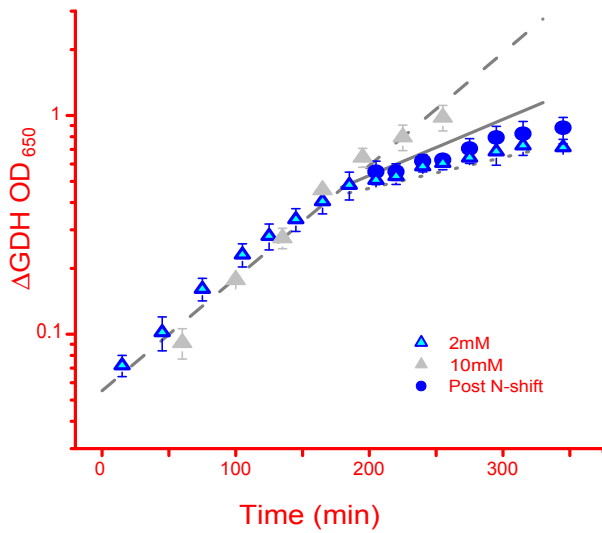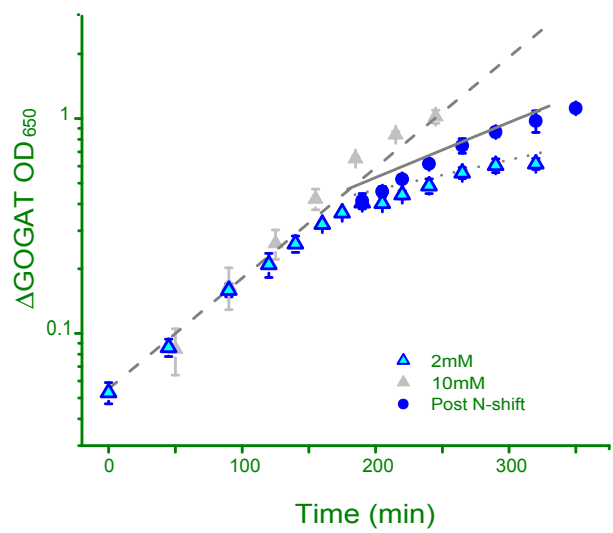

Supplementary Figure 3. Percentage of information in metabolome response matrix (Fig. 3) that is captured by characteristic metabolite response patterns identified by SVD.

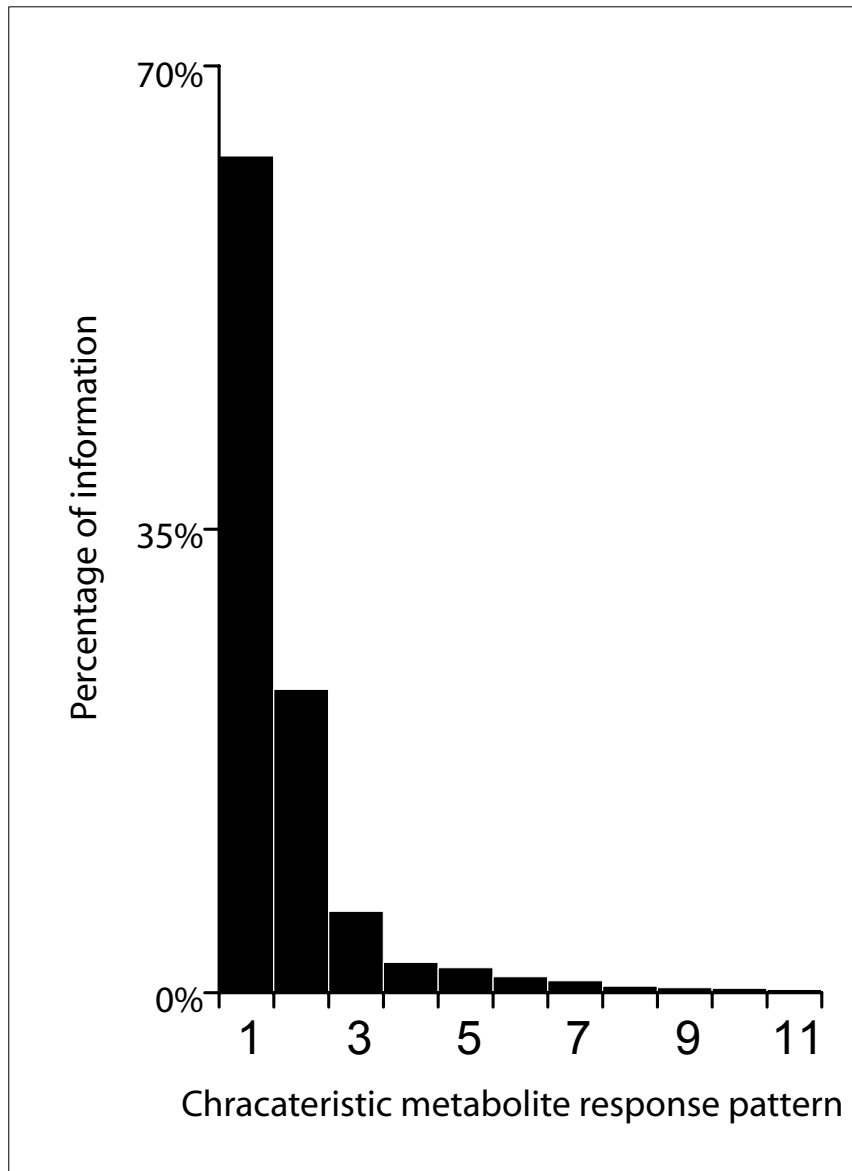

Supplementary Figure 4. Response of glycolytic intermediates (left), TCA cycle intermediates (middle) and key cofactors (right) to N-upshift. Fold change is relative to exponentially growing *E. coli*, and the data are the same as those used for Fig. 3.

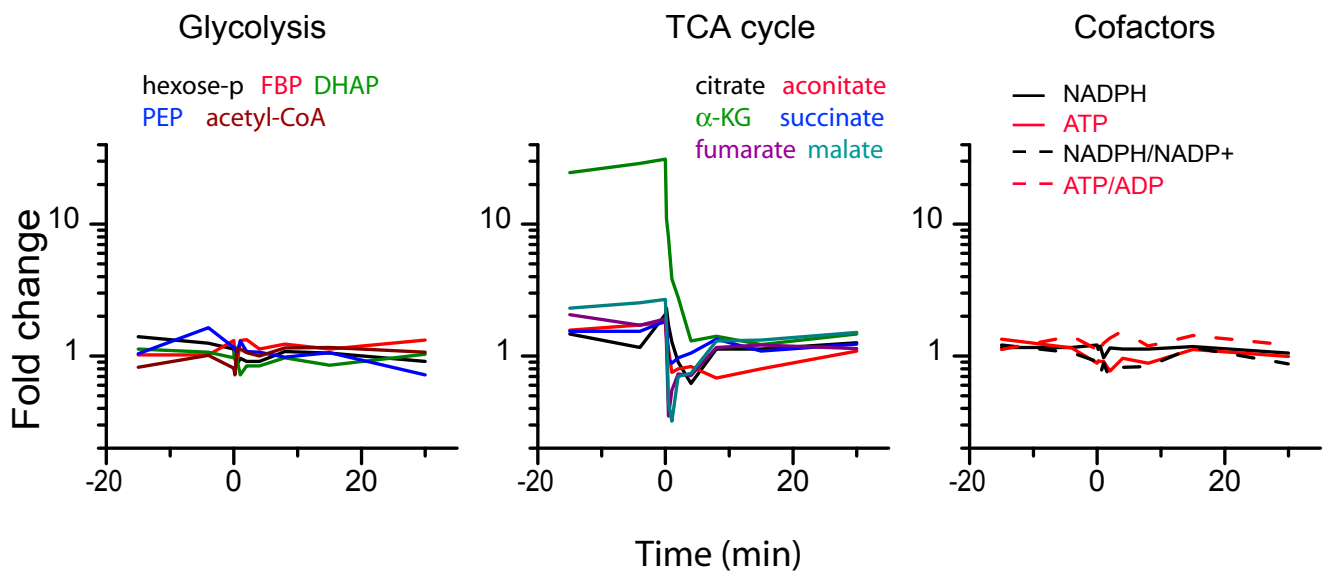

Supplementary Figure 5.  $\Delta$ AmtB (●) displays similar responses to N-upshift as WT (■). Data are represented as mean  $\pm$  SEM ( $n \geq 2$  independent experiments, see method for details). Lines directly join adjacent points.

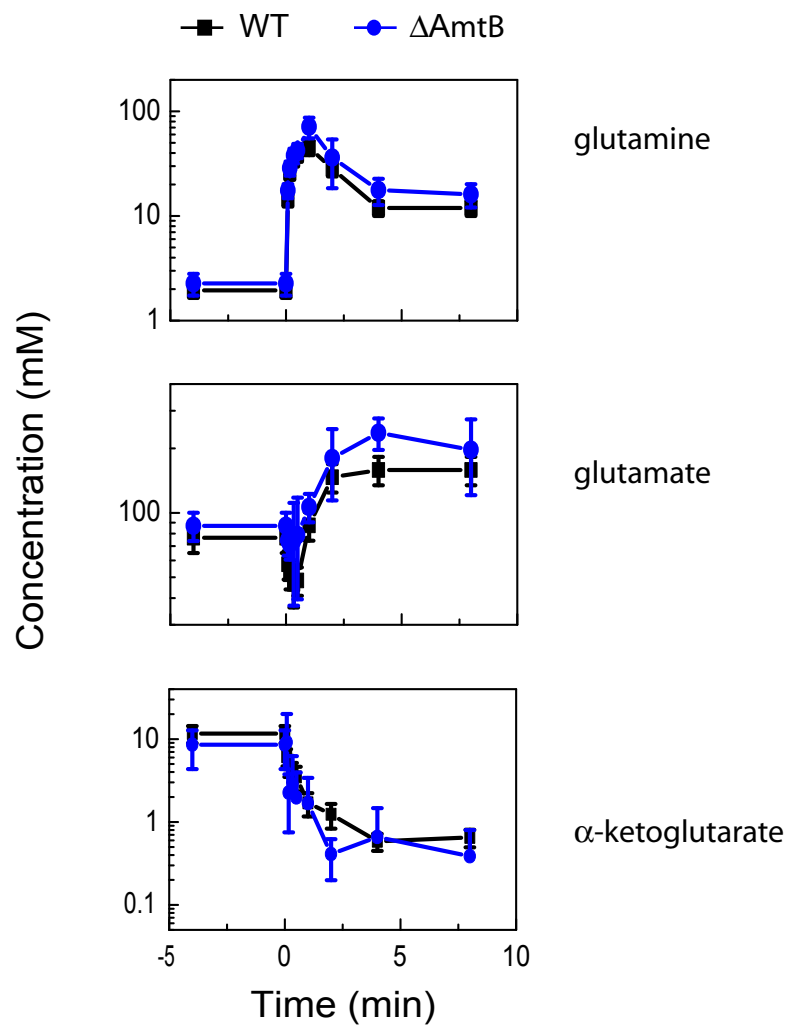

Supplementary Figure 6. Consumption of the trace residual ammonium on the filters when N-limited *E. coli* were shifted to plates with zero ammonium. Data are mean  $\pm$  SEM (n=3 independent measurements).

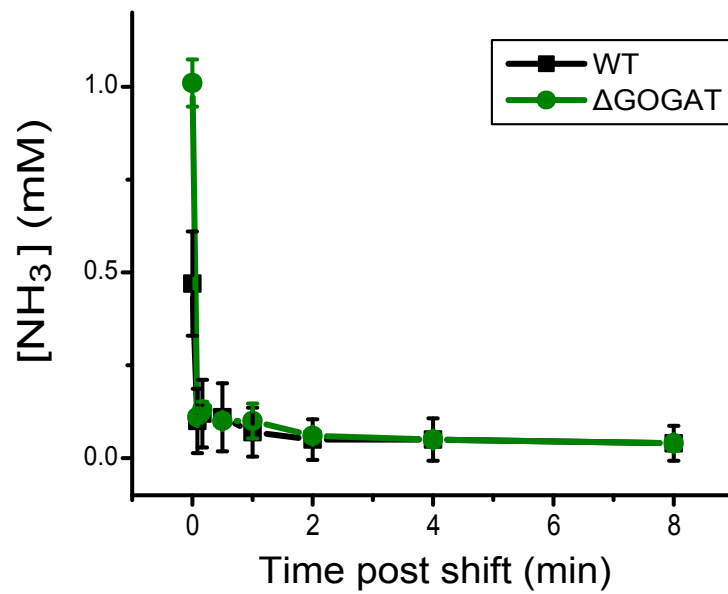

Supplementary Figure 7. Amino acids leaked by  $\Delta$ AT/AR strain upon N-upshift. Amounts shown were leaked in a 30 min period post N-upshift.

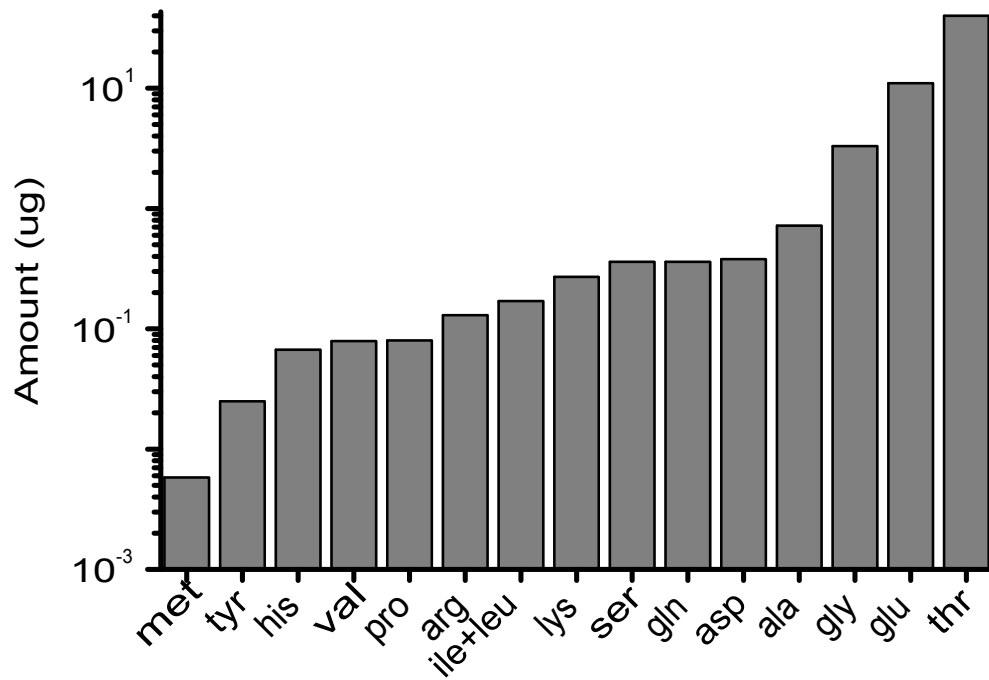



Supplementary Figure 8. Model simulation of flux dynamics in wild-type during 13-fold N-upshift.

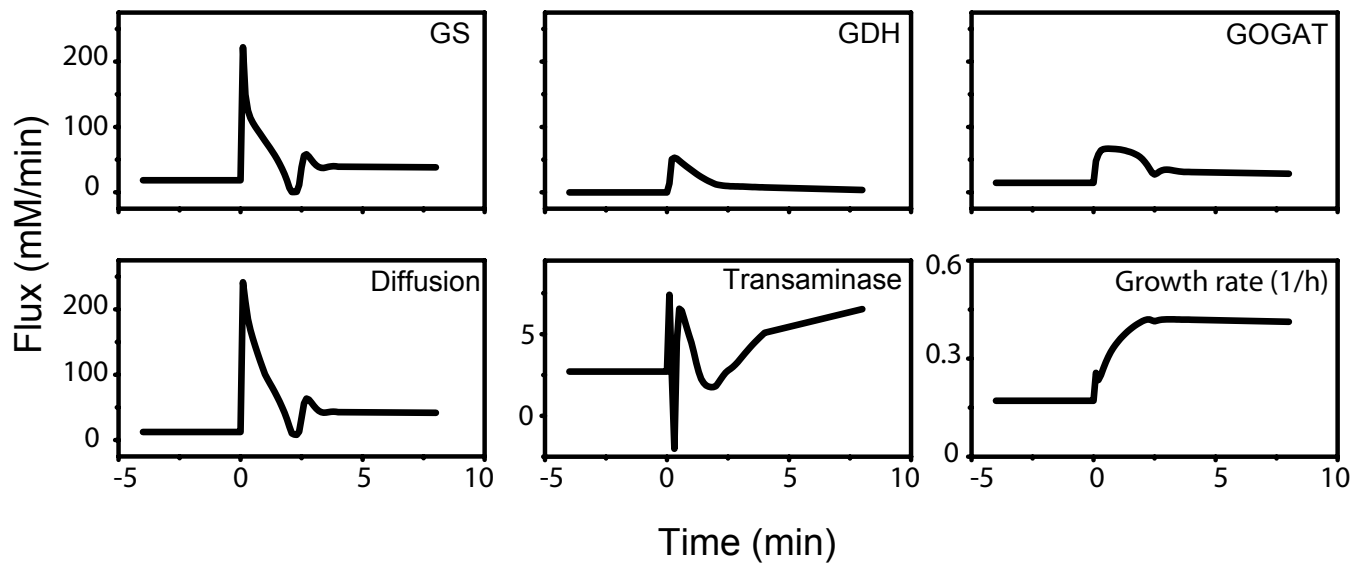

Supplementary Table 1. Measured fluxes of glutamate and glutamine in wild-type,  $\Delta$ GDH and  $\Delta$ GOGAT.

|                   | <b>Strain</b><br>(doubling time) | <b>k</b><br>(min <sup>-1</sup> ) | <b>Conc.</b><br>(mM) | <b>Measured flux</b><br>(mM min <sup>-1</sup> ) |
|-------------------|----------------------------------|----------------------------------|----------------------|-------------------------------------------------|
| <b>Glutamate*</b> | WT (58 min)                      | 1.0± 0.1                         | 96                   | 96 ±10                                          |
|                   | $\Delta$ GDH (56 min)            | 1.0± 0.1                         | 86                   | 86 ±15                                          |
|                   | $\Delta$ GOGAT (57 min)          | 1.0± 0.1                         | 69                   | 70 ±8                                           |
| <b>Glutamine</b>  | WT                               | 14.3±6.2                         | 3.8                  | 54 ±24                                          |
|                   | $\Delta$ GDH                     | 14.3±6.2                         | 4.0                  | 57 ±26                                          |
|                   | $\Delta$ GOGAT                   | 2.5±0.2                          | 5.3                  | 13 ±2                                           |

\*Although the rate constant (k) of <sup>15</sup>N incorporation from <sup>15</sup>N-ammonium into glutamate did not change in either mutant compared to wildtype strain, the concentration of glutamate decreased slightly in both mutants (p=0.002 for  $\Delta$ GOGAT, n.s. for  $\Delta$ GDH), resulting in reduced glutamate flux (flux is the product of the rate constant k and corresponding metabolite concentration). The significantly reduced flux in  $\Delta$ GOGAT is consistent with reduced glutamate consumption by the GS to feed the GS/GOGAT cycle. The rate constants (k) and errors ( $\Delta$ k) were obtained by fitting the decay of fraction unlabeled data (Supplementary Fig. 1 C, D) to appropriate equations (see Yuan et al. 2008) using Origin 6.0 (Origin lab). Metabolite concentrations in wild-type are as reported (Bennett *et al.* 2009). Metabolite concentrations in mutants were calculated from corresponding concentrations in wild-type and the ratio between mutants and wild-type (Supp. Fig. 1 B). Error of measured fluxes ( $\Delta F$ ) were calculated from error of metabolite concentrations ( $\Delta C$ ) and rate constants ( $\Delta k$ ) using following equation:

$$\left(\frac{\Delta F}{F}\right)^2 = \left(\frac{\Delta k}{k}\right)^2 + \left(\frac{\Delta C}{C}\right)^2$$

Supplementary Table 2: Metabolite projections onto the top two characteristic response patterns identified by SVD. For the characteristic response patterns, see Fig. 3.

| Characteristic vector 1   |       | Characteristic vector 2 |       |
|---------------------------|-------|-------------------------|-------|
| $\alpha$ -ketoglutarate   | 9.01  | Glutamine               | 5.27  |
| Phenylpyruvate            | 7.82  | Tyrosine                | 2.83  |
| Tyrosine                  | 6.03  | Asparagine              | 2.74  |
| Phenylalanine             | 5.43  | Tryptophan              | 2.49  |
| Glutamine                 | 4.54  | Phenylalanine           | 1.43  |
| Tryptophan                | 4.13  | Aspartate               | 1.41  |
| 2,3-Dihydroxybenzoic acid | 3.56  | Glycine                 | 1.38  |
| (Iso)leucine              | 2.10  | Alanine                 | 1.29  |
| Asparagine                | 1.86  | Glutamate               | 0.91  |
| dCTP                      | 1.77  | Lysine                  | 0.73  |
| Histidine                 | 1.68  | Dihydrooroate           | 0.60  |
| Citrate                   | 1.45  | Glucono-lactone         | 0.56  |
| Lysine                    | 1.33  | Serine                  | 0.51  |
| Glutathione-Reduced       | 1.20  | Acetyl-CoA              | 0.50  |
| dATP                      | 1.20  | dCTP                    | 0.45  |
| Succinate                 | 1.10  | Threonine               | 0.42  |
| Arginine                  | 1.04  | Glucosamine             | 0.37  |
| Valine                    | 0.86  | FBP                     | 0.24  |
| Threonine                 | 0.70  | Methionine              | 0.20  |
| Aconitate                 | 0.64  | NADP <sup>+</sup>       | 0.15  |
| S-Adenosyl-Methionine     | 0.64  | UDPGA                   | 0.08  |
| Phosphoenolpyruvate       | 0.61  | Valine                  | 0.02  |
| Malate                    | 0.55  | 3-Phospho-glycerate     | 0.02  |
| ATP                       | 0.55  | ATP                     | -0.03 |
| NADP <sup>+</sup>         | 0.49  | Glutathione-Reduced     | -0.09 |
| FBP                       | 0.44  | UDPAG                   | -0.10 |
| UDPGA                     | 0.43  | 6-Phosphogluconic acid  | -0.11 |
| Carbamoyl-Aspartate       | 0.43  | Glutathione-Oxidized    | -0.12 |
| Adenine                   | 0.27  | NAD <sup>+</sup>        | -0.13 |
| Glucono-lactone           | 0.23  | Phosphoenolpyruvate     | -0.23 |
| 3-Phospho-glycerate       | 0.16  | dATP                    | -0.31 |
| Hexose-Phosphate          | 0.15  | Carbamoyl-Aspartate     | -0.35 |
| Riboflavin                | 0.14  | Myo-inositol            | -0.35 |
| Alanine                   | 0.05  | UDP-D-glucose           | -0.38 |
| Glutathione-Oxidized      | 0.05  | NADPH                   | -0.38 |
| Fumarate                  | 0.00  | ADP                     | -0.42 |
| Serine                    | 0.00  | Pentose-phosphate       | -0.47 |
| NADPH                     | -0.15 | Adenine                 | -0.48 |
| Acetyl-CoA                | -0.18 | Hexose-Phosphate        | -0.49 |
| DHAP                      | -0.18 | DHAP                    | -0.51 |

|                              |       |                               |       |
|------------------------------|-------|-------------------------------|-------|
| Erythrose-4-phosphate        | -0.28 | Proline                       | -0.51 |
| Myo-inositol                 | -0.30 | PRPP                          | -0.59 |
| ADP                          | -0.30 | Erythrose-4-phosphate         | -0.63 |
| NAD <sup>+</sup>             | -0.30 | (Iso)leucine                  | -0.64 |
| UDPAG                        | -0.41 | 2-Deoxyribose- 1(5)-Phosphate | -0.65 |
| UDP-D-glucose                | -0.43 | Arginine                      | -0.66 |
| Glucosamine                  | -0.56 | Orotate                       | -0.72 |
| Glutamate                    | -0.56 | Citrate                       | -0.76 |
| PRPP                         | -0.64 | AMP                           | -0.81 |
| Pentose-phosphate            | -0.83 | Succinate                     | -0.81 |
| Dihydrooroate                | -0.92 | Riboflavin                    | -1.29 |
| Methionine                   | -1.02 | Aconitate                     | -1.48 |
| Proline                      | -1.03 | Phenylpyruvate                | -1.50 |
| AMP                          | -1.23 | 2,3-Dihydroxybenzoic Acid     | -1.86 |
| 6-Phosphogluconic Acid       | -1.35 | Fumarate                      | -1.88 |
| Glycine                      | -1.37 | Histidine                     | -1.93 |
| Orotate                      | -1.88 | Malate                        | -2.49 |
| Aspartate                    | -2.36 | S-Adenosyl-Methionine         | -2.82 |
| 2-Deoxyribose-1(5)-Phosphate | -2.64 | $\alpha$ -ketoglutarate       | -3.92 |

Supplementary Table 3. Parameter values for the kinetic model.

| <b>Literature parameters</b>                              |                                 |                                             |             |
|-----------------------------------------------------------|---------------------------------|---------------------------------------------|-------------|
| Enzyme                                                    | Parameter                       | Value (mM)                                  | Reference   |
| Glutamine synthetase (GS)                                 | $K_m$ , $\text{NH}_3$           | 0.1                                         | Alibhai 94  |
|                                                           | $K_m$ , Glutamate               | 5.5                                         |             |
| Glutamate synthase (GOGAT)                                | $K_m$ , $\alpha$ -Ketoglutarate | $7.0 \times 10^{-3}$                        | Miller 72   |
|                                                           | $K_i$ , Glutamate               | 28                                          |             |
|                                                           | $K_i$ , Aspartate               | 0.35                                        |             |
| Glutamate dehydrogenase (GDH)                             | $K_m$ , $\text{NH}_3$           | 1.5                                         | Sakamoto 75 |
|                                                           | $K_m$ , $\alpha$ -Ketoglutarate | 0.64                                        |             |
|                                                           | $K_i$ , Glutamate               | 1.3                                         |             |
| Aspartate aminotransferase (AST)                          | $K_m$ , Glutamate               | 0.9                                         | Powell 78   |
|                                                           | $K_m$ , Oxaloacetate            | 0.58                                        |             |
|                                                           | $K_i$ , Aspartate               | 0.45                                        | Deu 02      |
|                                                           | $K_i$ , $\alpha$ -Ketoglutarate | 0.59                                        |             |
| <b>Directly measured parameters</b>                       |                                 |                                             |             |
| Fold GS underexpression in $\Delta$ GOGAT                 |                                 | 0.5                                         |             |
| Fold GDH overexpression in $\Delta$ GOGAT                 |                                 | 3                                           |             |
| <b>Parameters selected based on data in Fig. 4</b>        |                                 |                                             |             |
| Enzyme                                                    | Parameter                       | Value                                       |             |
| Glutamine synthetase (GS)                                 | $V_{\max}$ , unadenylated       | $9.12 \times 10^3$ mM/min                   |             |
|                                                           | $V_{\max}$ , adenylylated       | 6.10 mM/min                                 |             |
|                                                           | $K_i$ , Glutamine               | $5.96 \times 10^{-2}$ mM                    |             |
| Glutamate synthase (GOGAT)                                | $V_{\max}$                      | 74.8 mM/min                                 |             |
|                                                           | $K_m$ , Glutamine               | 0.795 mM                                    |             |
| Glutamate dehydrogenase (GDH)                             | $V_{\max}$                      | 645 mM/min                                  |             |
| Aspartate aminotransferase (AST)                          | $V_{\max}$                      | $3.79 \times 10^3$ mM/min                   |             |
| Adenyltransferase/adenyl-removing enzyme (ATAR)           | $V_{\max}$ , AT                 | 0.887 (fraction of GS)/min                  |             |
|                                                           | $K_m$ , GS                      | $1.19 \times 10^{-5}$ (fraction of GS)      |             |
|                                                           | $K_m$ , PII                     | $3.65 \times 10^{-4}$ (fraction of PII)     |             |
|                                                           | $K_i$ , $\alpha$ -Ketoglutarate | $9.8 \times 10^{-3}$ mM                     |             |
|                                                           | $K_m/K_i$ , Glutamine           | 12.2 mM                                     |             |
|                                                           | $V_{\max}$ , AR                 | 8.09 (fraction of GS)/min                   |             |
|                                                           | $K_m$ , GSAMP                   | 6.97 (fraction of GS)                       |             |
|                                                           | $K_m$ , PIIUMP                  | $1.95 \times 10^{-3}$ (fraction of PII)     |             |
| Uridyltransferase/uridyl-removing enzyme (UTUR)           | $V_{\max}$ , UT                 | 0.251 (fraction of PII)/min                 |             |
|                                                           | $K_m$ , PII                     | $1.91 \times 10^{-2}$ (fraction of PII)     |             |
|                                                           | $K_m/K_i$ , Glutamine           | 0.016 mM                                    |             |
|                                                           | $V_{\max}$ , UR                 | $1.09 \times 10^{-4}$ (fraction of PII)/min |             |
|                                                           | $K_m$ , PIIUMP                  | $7.55 \times 10^{-3}$ (fraction of PII)     |             |
| Ammonia membrane diffusion constant ( $k_{\text{diff}}$ ) |                                 | $24.6 \text{ min}^{-1}$                     |             |

Supplementary Table 4A. Thermodynamics of the GOGAT reaction

| Reaction                | Glutamine+ $\alpha$ -ketoglutarate+NADPH $\rightarrow$ 2 Glutamate +NADP <sup>+</sup> |                   |                |                          |                     |                       |                     |                                          |
|-------------------------|---------------------------------------------------------------------------------------|-------------------|----------------|--------------------------|---------------------|-----------------------|---------------------|------------------------------------------|
|                         | Glutamine (mM)                                                                        | $\alpha$ -KG (mM) | Glutamate (mM) | NADP <sup>+</sup> /NADPH | K <sub>eq</sub>     | Q (reaction quotient) | $\Delta$ G (KJ/mol) | Fold forward driven (K <sub>eq</sub> /Q) |
| Pre-shift <sup>a</sup>  | 1.95                                                                                  | 11.7              | 76.6           | 0.33 <sup>c</sup>        | 390000 <sup>d</sup> | 85.9                  | -21.7               | 4540                                     |
| Post-shift <sup>b</sup> | 10                                                                                    | 0.6               | 160            |                          |                     | 1421.2                | -14.5               | 274                                      |

a. The steady state before N-upshift (i.e.,  $t \leq 0$  min in Fig. 3 & 4)

b. The steady state post N-upshift (i.e.,  $t \geq 8$  min in Fig. 3 & 4)

c. Penfound, T. & Foster, J. Biosynthesis and recycling of NAD. In *Escherichia coli* and *Salmonella*: cellular and molecular biology (Neidhardt EA, ed.) (1996).

d. K<sub>eq</sub> of GOGAT was calculated from the K<sub>eq</sub>'s of GS, GDH and ATP hydrolysis. The source of all K<sub>eq</sub>'s was the NIST database of Thermodynamics of Enzyme-Catalyzed Reactions ([http://xpd.nist.gov/enzyme\\_thermodynamics/](http://xpd.nist.gov/enzyme_thermodynamics/))

Supplementary Table 4B. GOGAT active site competition allows flux regulation. Values are the average occupancy of the GOGAT active site by glutamine as calculated in Eq. 2, in the presence of the competing species listed.

|                                                                 | GLN occupancy (nitrogen limited) | GLN occupancy (post up-shift) | FOLD CHANGE |
|-----------------------------------------------------------------|----------------------------------|-------------------------------|-------------|
| No competition                                                  | 84                               | 98                            | 1.2         |
| Glu competition                                                 | 60                               | 89                            | 1.5         |
| Glu + Asp competition <sup>e</sup> , (K <sub>GLN</sub> =0.3 mM) | 40                               | 67                            | 1.7         |
| Glu + Asp competition <sup>f</sup> , (K <sub>GLN</sub> =0.8 mM) | 25                               | 51                            | 2.0         |

e. Calculated using literature reported K<sub>m</sub> of glutamine (0.3 mM).

f. Calculated using adjusted K<sub>m</sub> of glutamine (0.8 mM).

Supplementary Table 4C. Contribution of kinetic and mass action terms to elasticity coefficient (EC,  $\partial \ln V / \partial \ln C$ ) of reaction rate with respect to each metabolite<sup>g</sup>, calculated without aspartate as a competitor (rows 3 and 4) and with (rows 5 and 6) using literature K<sub>GLN</sub>, and with aspartate as a competitor as well as using adjusted K<sub>GLN</sub>.

|                                                      | Glutamine |             |             | $\alpha$ -ketoglutarate |             |         | Glutamate |             |          | Aspartate    |
|------------------------------------------------------|-----------|-------------|-------------|-------------------------|-------------|---------|-----------|-------------|----------|--------------|
|                                                      | kinetic   | mass action | SUM (EC)    | kinetic                 | mass action | SUM(EC) | kinetic   | mass action | SUM (EC) | kinetic      |
| Pre-shift <sup>e</sup> , (K <sub>GLN</sub> =0.3 mM)  | -0.64     | 1.00        | <b>0.37</b> | -1.00                   | 1.00        | 0.00    | -0.27     | -0.0013     | -0.27    | Not included |
| Post-shift <sup>e</sup> , (K <sub>GLN</sub> =0.3 mM) | -0.83     | 1.01        | <b>0.18</b> | -0.93                   | 1.01        | 0.08    | -0.20     | -0.022      | -0.23    |              |
| Pre-shift <sup>e</sup> , (K <sub>GLN</sub> =0.3 mM)  | -0.42     | 1.00        | <b>0.58</b> | -1.00                   | 1.00        | 0.00    | -0.18     | -0.0013     | -0.18    | -0.34        |
| Post-shift <sup>e</sup> , (K <sub>GLN</sub> =0.3 mM) | -0.58     | 1.01        | <b>0.43</b> | -0.93                   | 1.01        | 0.08    | -0.16     | -0.022      | -0.18    | -0.30        |
| Pre-shift <sup>f</sup> , (K <sub>GLN</sub> =0.8 mM)  | -0.21     | 1.00        | <b>0.79</b> | -1.00                   | 1.00        | 0.00    | -0.24     | -0.0013     | -0.24    | -0.46        |
| Post-shift <sup>f</sup> , (K <sub>GLN</sub> =0.8 mM) | -0.35     | 1.01        | <b>0.67</b> | -0.9274                 | 1.01        | 0.08    | -0.22     | -0.022      | -0.24    | -0.47        |

g. Calculated according to Hofmeyr, J S. Journal of Bioenergetics and Biomembranes, Vol. 27, No. 5, 1995

Supplementary Table 5A. Reaction rate formulations employed in the model.

For detailed analysis of rate equations of this form, see Rohwer et al., 2006.

$$v_{GOG} = \frac{\frac{V_{\max}}{K_{GLN}K_{\alpha KG}} \left( [GLN] \cdot [\alpha KG] - \frac{[GLU]^2}{K_{eq}} \right)}{\left( 1 + \frac{[GLN]}{K_{GLN}} + \frac{[GLU]}{K_{GLU}} + \frac{[ASP]}{K_{ASP}} \right) \left( 1 + \frac{[\alpha KG]}{K_{\alpha KG}} + \frac{[GLU]}{K_{GLU}} \right)}$$

$$v_{GS} = \frac{\frac{V_{\max}}{K_{GLU}K_{NH3}} \left( [GLU] \cdot [NH3]_{int} - \frac{[GLN]}{K_{eq}} \right)}{\left( 1 + \frac{[GLU]}{K_{GLU}} + \frac{[GLN]}{K_{GLN}} \right) \left( 1 + \frac{[NH3]_{int}}{K_{NH3}} \right)}$$

$$v_{GDH} = \frac{\frac{V_{\max}}{K_{\alpha KG}K_{NH3}} \left( [\alpha KG] \cdot [NH3]_{int} - \frac{[GLU]}{K_{eq}} \right)}{\left( 1 + \frac{[\alpha KG]}{K_{\alpha KG}} + \frac{[GLU]}{K_{GLU}} \right) \left( 1 + \frac{[NH3]_{int}}{K_{NH3}} \right)}$$

$$v_{AST} = \frac{\frac{V_{\max}}{K_{GLU}K_{OA}} \left( [GLU] \cdot [OA] - \frac{[\alpha KG][ASP]}{K_{eq}} \right)}{\left( 1 + \frac{[GLU]}{K_{GLU}} + \frac{[\alpha KG]}{K_{\alpha KG}} \right) \left( 1 + \frac{[OA]}{K_{OA}} + \frac{[ASP]}{K_{ASP}} \right)}$$

$$v_{AT} = V_{\max} \left( \frac{[GS]}{K_{GS} + [GS]} \right) \left( \frac{[PII]}{K_{PII} \left( 1 + \frac{[KG]}{K_{KG}} \right) + [PII]} \right) \left( \frac{[GLN]}{K_{GLN} + [GLN]} \right)$$

$$v_{AR} = \frac{V_{\max} \left( \frac{[GSAMP]}{K_{GSAMP} + [GSAMP]} \right) \left( \frac{[PIIUMP]}{K_{PIIUMP} + [PIIUMP]} \right)}{\left( 1 + \frac{[GLN]}{K_{GLN}} \right)}$$

$$v_{UT} = \frac{V_{\max} \left( \frac{[PII]}{K_{PII} + [PII]} \right)}{\left( 1 + \frac{[GLN]}{K_{GLN}} \right)}$$

$$v_{UR} = V_{\max} \left( \frac{[PIIUMP]}{K_{PIIUMP} + [PIIUMP]} \right) \left( \frac{[GLN]}{K_{GLN} + [GLN]} \right)$$

$$\tau = \tau_0 \left( 1 + \left( \frac{K_{GLN}}{[GLN]} \right)^2 + \left( \frac{K_{GLU}}{[GLU]} \right)^2 \right)$$

Following formulation was used for GOGAT reaction in the initial modeling attempt, **before competition by aspartate was included**. This equation was not employed in the final model.

$$v_{GOG} = \frac{\frac{V_{\max}}{K_{GLN} K_{\alpha KG}} \left( [GLN] \cdot [\alpha KG] - \frac{[GLU]^2}{K_{eq}} \right)}{\left( 1 + \frac{[GLN]}{K_{GLN}} + \frac{[GLU]}{K_{GLU}} \right) \left( 1 + \frac{[\alpha KG]}{K_{\alpha KG}} + \frac{[GLU]}{K_{GLU}} \right)}$$

### Reference:

Rohwer, J.M., Hanekom, A.J., Crous, C., Snoep, J.L. and Hofmeyr, J.H. (2006) Evaluation of a simplified generic bi-substrate rate equation for computational systems biology. *Syst Biol (Stevenage)*, **153**, 338-341.

Supplementary Table 5B. Differential equations employed in the model.

$V_{GLU,N}$ ,  $V_{GLU,F}$ ,  $V_{GLN,N}$ ,  $V_{GLN,F}$ ,  $V_{ASP,F}$  represent reactions leading to biomass generation and therefore are proportional to  $\tau$ . Subscript N or T indicates the reaction consumes the amino group only (e.g., transamination to produce other amino acids or nucleotides) or the entire molecule respectively (e.g., protein synthesis).

$V_{GLN,N} = 882.0 \text{ mM}/\tau$ ;  $V_{GLN,F} = 107.9 \text{ mM}/\tau$ ;  $V_{GLU,N} = 3046.0/\tau$ ;  $V_{GLU,F} = 347.0/\tau$ ;  
 $V_{ASP,F} = 658.0/\tau$

$$\frac{d[GLU]}{dt} = 2 \cdot v_{GOG} + v_{GDH} - v_{GS} - v_{AST} - v_{GLU,N} - v_{GLU,F} + v_{GLN,N}$$

$$\frac{d[GLN]}{dt} = v_{GS} - v_{GOG} - v_{GLN,N} - v_{GLN,F}$$

$$\frac{d[ASP]}{dt} = v_{AST} - v_{ASP,F}$$

$$\frac{d[GS]}{dt} = v_{AR} - v_{AT}$$

$$\frac{d[PII]}{dt} = v_{UR} - v_{UT}$$

$$\frac{d[NH3_{int}]}{dt} = k_{diff} ([NH3_{ext}] - [NH3_{int}]) - v_{GS} - v_{GDH}$$



Supplementary table 6A. Thermodynamics of the aspartate aminotransferase reaction.

|                                 |                                                                                                                                                                                           |             |                |                   |                       |                                              |                       |                     |                                    |
|---------------------------------|-------------------------------------------------------------------------------------------------------------------------------------------------------------------------------------------|-------------|----------------|-------------------|-----------------------|----------------------------------------------|-----------------------|---------------------|------------------------------------|
| Reactions involved <sup>a</sup> | Glutamate+oxaloacetate $\rightleftharpoons$ aspartate+ $\alpha$ -ketoglutarate ( $K_{eq1}=6.7$ )<br>Malate+NAD <sup>+</sup> $\rightleftharpoons$ oxaloacetate +NADH ( $K_{eq2}=0.00025$ ) |             |                |                   |                       |                                              |                       |                     |                                    |
| Overall rxn                     | Glutamate+malate+NAD <sup>+</sup> $\rightleftharpoons$ aspartate+ $\alpha$ -KG+NADH                                                                                                       |             |                |                   |                       |                                              |                       |                     |                                    |
|                                 | Glutamate (mM)                                                                                                                                                                            | Malate (mM) | Aspartate (mM) | $\alpha$ -KG (mM) | NADH/NAD <sup>+</sup> | $K_{eq}(\text{overall}) = K_{eq1} * K_{eq2}$ | Q (reaction quotient) | $\Delta G$ (KJ/mol) | Fold forward driven ( $K_{eq}/Q$ ) |
| Pre-shift <sup>b</sup>          | 76.6                                                                                                                                                                                      | 3.6         | 1.83           | 11.6              | 0.02 <sup>d</sup>     | $1.7 \times 10^{-3}$                         | $1.5 \times 10^{-3}$  | -0.25               | 1.1                                |
| Post-shift <sup>c</sup>         | 160                                                                                                                                                                                       | 1.3         | 6.0            | 0.60              |                       |                                              | $2.7 \times 10^{-4}$  | -4.7                | 6.3                                |

a. The source of  $K_{eq}$ 's is the NIST database of Thermodynamics of Enzyme-Catalyzed Reactions ([http://xpd.nist.gov/enzyme\\_thermodynamics/](http://xpd.nist.gov/enzyme_thermodynamics/))

b. The steady state before N-upshift (i.e.,  $t \leq 0$  min in Fig. 3 & 4)

c. The steady state post N-upshift (i.e.,  $t \geq 8$  min in Fig. 3 & 4)

d. Bennett, B. D.; Kimball, E.; Gao, M.; Osterhout, R.; Van Dien, S. J.; Rabinowitz, J. D., Absolute metabolite concentrations and implied enzyme active site occupancy in *Escherichia coli*. Nature Chemical biology 2009, in press. The best estimate of NAD<sup>+</sup> / NADH ratio from Bennett was 31. However, the 95% confidence limits were broad (18—51) and the value of 31 resulted in a slightly positive  $\Delta G$  for the AST reaction during N-limitation, which is not possible. Accordingly, a somewhat higher value of 50 was used here. Note that, for the purpose of this work, a shift in the NAD<sup>+</sup> / NADH ratio is equivalent to changing the  $\Delta G'$  for the MDH reaction. The shift of NAD<sup>+</sup> / NADH ratio from 31 to 50 is equivalent to an error in  $\Delta G'$  measurement of 1.2 kJ/mol, which is within error range reported for  $\Delta G'$  for this reaction.

Supplementary Table 6B. Aspartate aminotransferase active site competition. The 5-carbon unit binding site of AST can bind glutamate or  $\alpha$ -ketoglutarate; the 4-carbon unit binding site can bind aspartate or oxaloacetate.

|               |                         | OCCUPANCY pre-perturbation | OCCUPANCY post-perturbation | FOLD CHANGE |
|---------------|-------------------------|----------------------------|-----------------------------|-------------|
| 5-carbon site | Glutamate               | 79                         | 99                          | 1.2         |
|               | $\alpha$ -ketoglutarate | 20                         | 0.6                         | 0.03        |
| 4-carbon site | Aspartate               | 76                         | 92                          | 1.2         |
|               | Oxaloacetate            | 2                          | 0.6                         | 0.3         |

Supplementary Table 6C. Contribution of kinetic and mass action terms to elasticity coefficient (EC,  $\partial \ln V / \partial \ln C$ ) of reaction rate with respect to each metabolite<sup>e</sup>.

|            | Glutamate |             |          | Oxaloacetate |             |          | Aspartate |             |          | $\alpha$ -ketoglutarate |             |          |
|------------|-----------|-------------|----------|--------------|-------------|----------|-----------|-------------|----------|-------------------------|-------------|----------|
|            | kinetic   | mass action | SUM (EC) | kinetic      | mass action | SUM (EC) | kinetic   | mass action | SUM (EC) | kinetic                 | mass action | SUM (EC) |
| Pre-shift  | -0.80     | 12.4        | 11.6     | -0.0151      | 12.4        | 12.4     | -0.79     | -11.4       | -12.2    | -0.19                   | -11.4       | -11.6    |
| Post-shift | -0.99     | 1.26        | 0.27     | -0.0020      | 1.26        | 1.26     | -0.93     | -0.26       | -1.19    | -0.0057                 | -0.26       | -0.27    |

e. Calculated according to Hofmeyr, J S. Journal of Bioenergetics and Biomembranes, Vol. 27, No. 5, 1995

**Supplementary Table 7. Response coefficient\* of metabolite pools and fluxes to model parameters calculated by metabolic control analysis. Background is color coded to denote positive (yellow) or negative (blue) coefficient, and color intensity correlates with the magnitude of the coefficient.**

|                          | GLU pool               | GLN pool               | GS Flux                | GOGAT Flux             | Growth rate            |
|--------------------------|------------------------|------------------------|------------------------|------------------------|------------------------|
| GOGAT $V_{max}$          | $9.3 \times 10^{-1}$   | $-4.16 \times 10^{-1}$ | $1.21 \times 10^{-2}$  | $1.02 \times 10^{-2}$  | $-1.54 \times 10^{-3}$ |
| GOGAT $K_i$ Glu          | $2.42 \times 10^{-1}$  | $-1.10 \times 10^{-1}$ | $4.22 \times 10^{-3}$  | $2.04 \times 10^{-3}$  | $-2.17 \times 10^{-3}$ |
| GOGAT $K_m$ Gln          | $-7.5 \times 10^{-1}$  | $3.37 \times 10^{-1}$  | $-1.10 \times 10^{-2}$ | $-6.43 \times 10^{-3}$ | $2.22 \times 10^{-3}$  |
| GOGAT $K_m$ $\alpha$ -KG | $-2.19 \times 10^{-3}$ | 0                      | $9.5 \times 10^{-4}$   | $-1.67 \times 10^{-3}$ | $-8.49 \times 10^{-4}$ |
| GOGAT $K_i$ Asp          | $4.21 \times 10^{-1}$  | $-1.90 \times 10^{-1}$ | $6.22 \times 10^{-3}$  | $3.42 \times 10^{-3}$  | $-1.78 \times 10^{-3}$ |
| GS $V_{max}$             | $-5.11 \times 10^{-3}$ | $3.06 \times 10^{-3}$  | $5.68 \times 10^{-3}$  | $6.52 \times 10^{-3}$  | $6.82 \times 10^{-4}$  |
| GSAMP $V_{max}$          | 0                      | 0                      | $4.34 \times 10^{-5}$  | 0                      | 0                      |
| GS $K_m$ Glu             | $3.65 \times 10^{-3}$  | 0                      | $-5.28 \times 10^{-3}$ | $-3.66 \times 10^{-3}$ | $1.42 \times 10^{-3}$  |
| GS $K_m$ $\text{NH}_3$   | $5.11 \times 10^{-3}$  | $-3.06 \times 10^{-3}$ | $-5.27 \times 10^{-3}$ | $-6.52 \times 10^{-3}$ | $-6.82 \times 10^{-4}$ |
| GS $K_i$ Gln             | $-3.65 \times 10^{-3}$ | 0                      | $5.05 \times 10^{-3}$  | $2.31 \times 10^{-3}$  | $-1.42 \times 10^{-3}$ |
| GDH $V_{max}$            | $-5.11 \times 10^{-3}$ | 0                      | $6.14 \times 10^{-3}$  | $4.05 \times 10^{-3}$  | $-1.98 \times 10^{-3}$ |
| GDH $K_m$ $\alpha$ -KG   | $3.65 \times 10^{-3}$  | 0                      | $-4.58 \times 10^{-3}$ | $-3.66 \times 10^{-3}$ | $1.42 \times 10^{-3}$  |
| GDH $K_m$ $\text{NH}_3$  | $5.11 \times 10^{-3}$  | 0                      | $-6.14 \times 10^{-3}$ | $-4.05 \times 10^{-3}$ | $1.98 \times 10^{-3}$  |
| GDH $K_i$ Glu            | $-3.65 \times 10^{-3}$ | 0                      | $4.58 \times 10^{-3}$  | $3.66 \times 10^{-3}$  | $-1.42 \times 10^{-3}$ |
| $V_{max}$ AT             | $7.3 \times 10^{-4}$   | 0                      | $-4.37 \times 10^{-4}$ | $-1.93 \times 10^{-4}$ | $2.83 \times 10^{-4}$  |
| $K_m$ AT PII             | $-7.3 \times 10^{-4}$  | 0                      | $-1.01 \times 10^{-3}$ | $1.93 \times 10^{-4}$  | $-2.83 \times 10^{-4}$ |
| AT $K_m$ GS              | 0                      | 0                      | 0                      | 0                      | 0                      |
| AT/AR $K_m$ Gln          | $-7.3 \times 10^{-4}$  | 0                      | $4.37 \times 10^{-4}$  | $1.93 \times 10^{-4}$  | $-2.83 \times 10^{-4}$ |
| AT $K_i$ $\alpha$ -KG    | $7.3 \times 10^{-4}$   | 0                      | $3.18 \times 10^{-4}$  | $-1.93 \times 10^{-4}$ | $2.83 \times 10^{-4}$  |
| AR $V_{max}$             | $-7.3 \times 10^{-4}$  | 0                      | $9.69 \times 10^{-4}$  | $1.93 \times 10^{-4}$  | $-2.83 \times 10^{-4}$ |
| AR $K_m$ PIIUMP          | 0                      | 0                      | $6.93 \times 10^{-4}$  | 0                      | 0                      |
| AR $K_m$ GSAMP           | $7.30 \times 10^{-4}$  | 0                      | $9.50 \times 10^{-5}$  | $-1.93 \times 10^{-4}$ | $2.83 \times 10^{-4}$  |
| UT $V_{max}$             | 0                      | 0                      | $5.08 \times 10^{-5}$  | 0                      | 0                      |
| UT $K_m$ PII             | 0                      | 0                      | 0                      | 0                      | 0                      |
| UT/UR $K_m$ Gln          | 0                      | 0                      | $5.08 \times 10^{-5}$  | 0                      | 0                      |
| UR $V_{max}$             | 0                      | 0                      | 0                      | 0                      | 0                      |
| UR $K_m$ PIIUMP          | 0                      | 0                      | 0                      | 0                      | 0                      |
| AST $V_{max}$            | $-2.41 \times 10^{-2}$ | $1.22 \times 10^{-2}$  | $-1.88 \times 10^{-3}$ | $8.74 \times 10^{-5}$  | $1.31 \times 10^{-3}$  |
| AST $K_m$ OA             | $2.41 \times 10^{-2}$  | $-1.22 \times 10^{-2}$ | $2.57 \times 10^{-3}$  | $-8.74 \times 10^{-5}$ | $-1.31 \times 10^{-3}$ |
| AST $K_m$ Glu            | $5.11 \times 10^{-3}$  | 0                      | $-1.99 \times 10^{-3}$ | $1.35 \times 10^{-3}$  | $1.98 \times 10^{-3}$  |
| AST $K_i$ Asp            | $-1.83 \times 10^{-2}$ | $6.12 \times 10^{-3}$  | $2.22 \times 10^{-3}$  | $-1.01 \times 10^{-3}$ | $-1.75 \times 10^{-3}$ |
| AST $K_i$ $\alpha$ -KG   | $-5.11 \times 10^{-3}$ | 0                      | $1.99 \times 10^{-3}$  | $-1.35 \times 10^{-3}$ | $-1.98 \times 10^{-3}$ |
| $K_{diff}$ (ammonia)     | $-3.36 \times 10^{-2}$ | 1.16                   | $9.85 \times 10^{-1}$  | $9.85 \times 10^{-1}$  | $9.94 \times 10^{-1}$  |

\*: Response coefficient  $R(y,p)$  is calculated as following:

$$R(y,p) = (dy/dp) \cdot (p/y) = (dy/y) / (dp/p)$$

where  $y$  is a system variable (pool size or flux, listed in the 1<sup>st</sup> row) and  $p$  is a parameter ( $K$  and  $V$  listed in the first column).
